# Supplementary material for: Detection rates of recurrent prostate cancer: 68Gallium (Ga)-labelled prostate-specific membrane antigen versus choline PET/CT scans. A systematic review
Source: PubMed Central journal article supplement — Ther Adv Urol. 2019 Jan 8;11:1756287218815793. doi: 10.1177/1756287218815793 (PMC6329022; doi:10.1177/1756287218815793), 2019-01-08
Supplement: Supplemental.pdf [file Supplemental.pdf]

Supplement Figure 1

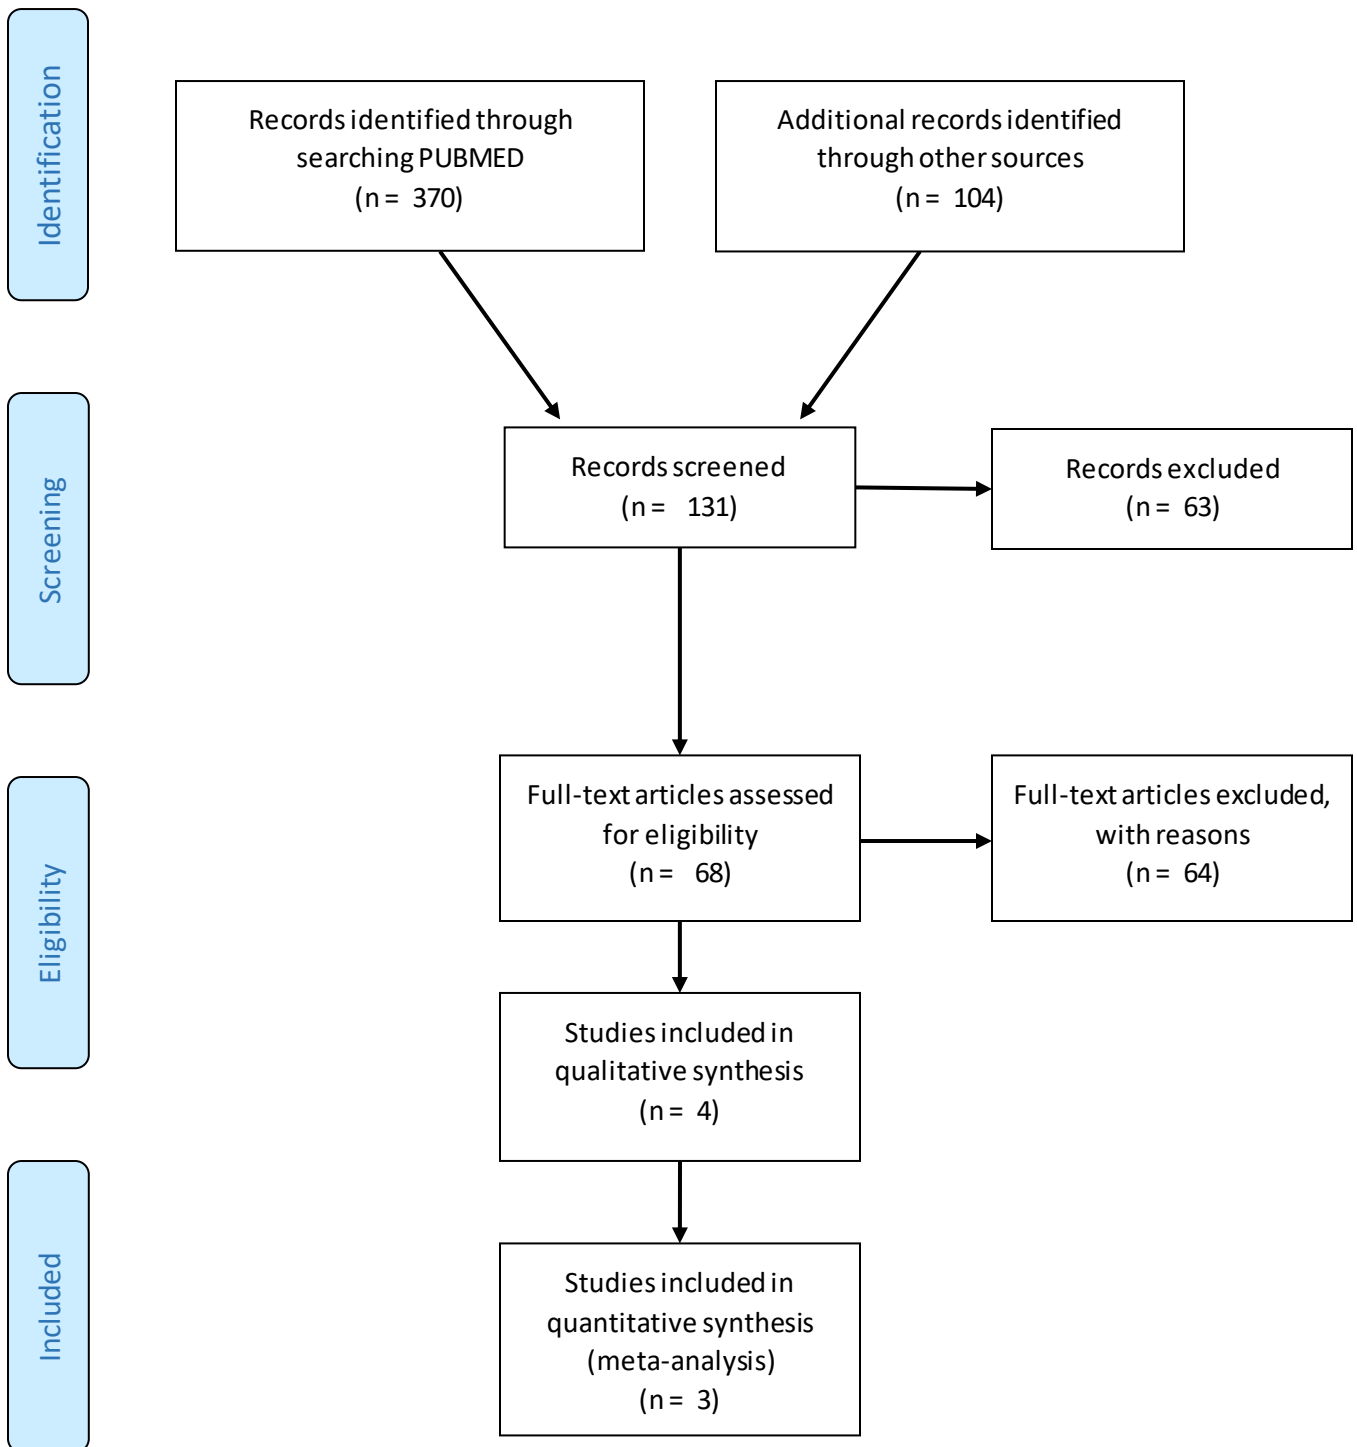

Supplement Figure 2

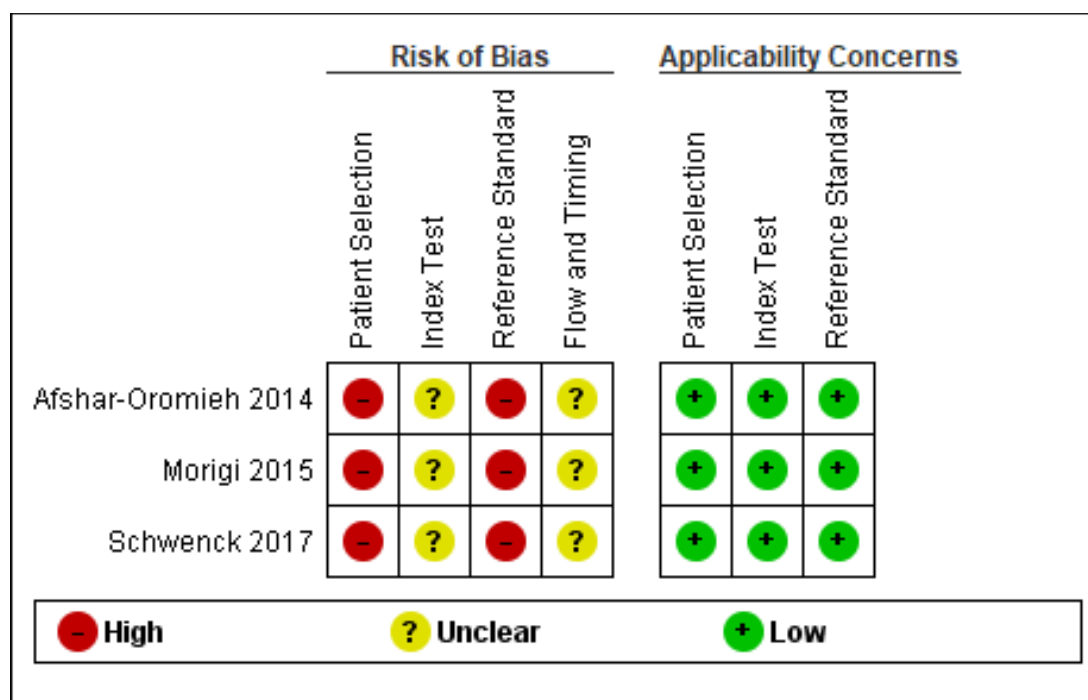

Supplement Table 1

| PSMA compared with Choline PET Scan for Recurrent Prostate cancer |                                        |                                   |                               |                              |                                                   |  |
|-------------------------------------------------------------------|----------------------------------------|-----------------------------------|-------------------------------|------------------------------|---------------------------------------------------|--|
| Outcomes                                                          | No of participants (studies) Follow-up | Certainty of the evidence (GRADE) | Relative effect (95% CI)      | Anticipated absolute effects |                                                   |  |
|                                                                   |                                        |                                   |                               | Risk with placebo            | Risk difference with PSMA PET Scans               |  |
| Overall Detection Rates                                           | 356 (3 observational studies)          | ⊕⊕○○ LOW                          | <b>OR 2.27</b> (1.06 to 4.85) | 669 per 1,000                | <b>152 more per 1,000</b> (13 more to 239 more)   |  |
| Detection Rates after BCR at PSA thresholds less than 2ng/ml      | 148 (2 observational studies)          | ⊕○○○ VERY LOW                     | <b>OR 2.37</b> (0.61 to 9.17) | 486 per 1,000                | <b>205 more per 1,000</b> (120 fewer to 410 more) |  |

---

**PSMA compared with Choline PET Scan for Recurrent Prostate cancer**

---

| Outcomes | No of participants (studies) Follow-up | Certainty of the evidence (GRADE) | Relative effect (95% CI) | Anticipated absolute effects |                                     |
|----------|----------------------------------------|-----------------------------------|--------------------------|------------------------------|-------------------------------------|
|          |                                        |                                   |                          | Risk with placebo            | Risk difference with PSMA PET Scans |

\***The risk in the intervention group** (and its 95% confidence interval) is based on the assumed risk in the comparison group and the **relative effect** of the intervention (and its 95% CI).

CI: Confidence interval; OR: Odds ratio

---

**GRADE Working Group grades of evidence**

**High certainty:** We are very confident that the true effect lies close to that of the estimate of the effect

**Moderate certainty:** We are moderately confident in the effect estimate: The true effect is likely to be close to the estimate of the effect, but there is a possibility that it is substantially different

**Low certainty:** Our confidence in the effect estimate is limited: The true effect may be substantially different from the estimate of the effect

**Very low certainty:** We have very little confidence in the effect estimate: The true effect is likely to be substantially different from the estimate of effect

---
